# Supplementary material
Source: PubMed Central journal article supplement (PMC2630877)
Supplement: jc.2008-1456_1.pdf [file jc.2008-1456_1.pdf]

**Supplementary Figure 1.** Primers used in RT-PCR and q-RT-PCR reactions.

|              |                            |
|--------------|----------------------------|
| mIGF2 Fwd    | TTCTCATCTCTTTGGCCTTCGCCT   |
| mIGF2 Rev    | ACGATGACGTTTGGCCTCTCTGAA   |
| hIGF2 Fwd    | TGGCATCGTTGAGGAGTGCTGTTT   |
| hIGF2 Rev    | GTTTGAAGATGCTGCTGTGCTTCCTC |
| mIGF1 Fwd    | ACCTCAGACAGGCATTGTGGATGA   |
| mIGF1 Rev    | AGCTTAGTGAGGACTGCCTTGCTT   |
| hIGF1 Fwd    | GCCTGCGCAATGGAATAAAGTCCT   |
| hIGF1 Rev    | TGCACTCCCTCTACTTGCGTTCTT   |
| q-hIGF2 Fwd  | GCTGGCAGAGGAGTGTCC         |
| q-hIGF2 Rev  | GCTGGCAGAGGAGTGTCC         |
| q-hVEGF Fwd  | GCACCCATGGCAGAAGG          |
| q-hVEGF Rev  | CTCGATTGGATGGCAGTAGCT      |
| q-hGAPDH Fwd | CCAACCGCGAGAAG             |
| q-hGAPDH Rev | TCCATCACGATGCC             |
