# Supplementary material
Source: PubMed Central journal article supplement (PMC2630877)
Supplement: jc.2008-1456_2.pdf [file jc.2008-1456_2.pdf]

Supplementary figure 2: NVP-AEW541 mediated growth inhibition of ACC xenografts in vivo.

A

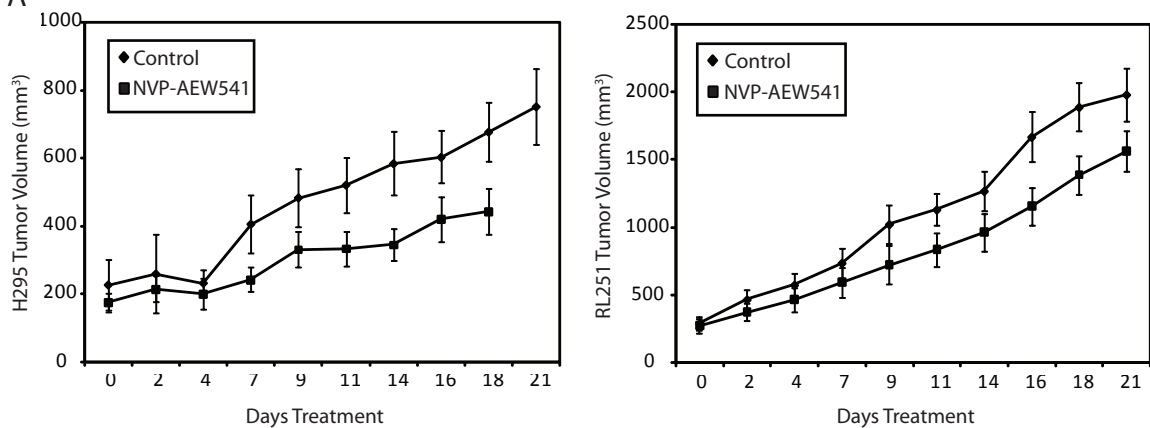

B

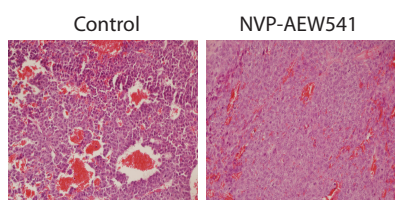

A, H295 (left panel) and RL251 (right panel) cells were injected subcutaneously into athymic nude mice and tumors were allowed to grow to ~200 mm<sup>3</sup>. Mice were randomized into treatment groups (n = 8 for H295 and n = 10 for RL251). Groups were treated with vehicle or NVP-AEW541 twice daily. Tumor dimensions on control (◆) mice or NVP-AEW541-treated (■) mice were measured three times a week for the duration of the 21 day study and data are represented as mean  $\pm$  S.E. B, H295 tumor xenograft sections stained with hematoxylin and eosin in NVP-AEW541 treated (right panel) and control tissues (left panel)
