# Supplementary material
Source: PubMed Central journal article supplement (PMC2630877)
Supplement: jc.2008-1456_3.pdf [file jc.2008-1456_3.pdf]

Supplementary Figure 3: NVP and mitotane synergistically inhibit ACC cell proliferation.

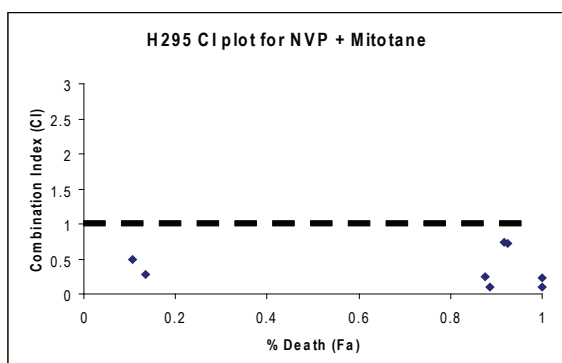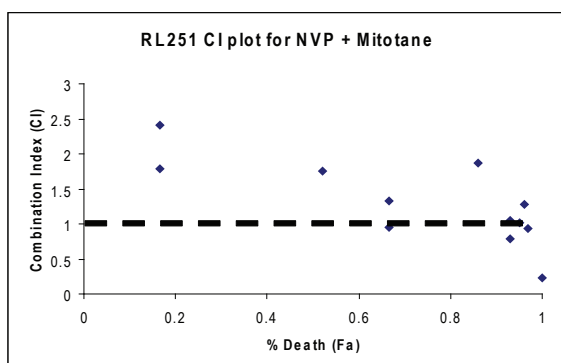

The combined drugs effects of NVP-AEW541 and mitotane on H295 (left panel) and RL251 (right panel) cell proliferation (data presented in Figure 6a) is quantitatively represented here using Calcsyn software. A combination index of less than one indicates a greater than predicted effect from the individual agents (synergy). A CI greater than one is consistent with an antagonistic effect and indicates the likelihood of synergy is very low.
